# Supplementary material for: Seasonal Climate Trends across the Wild Blueberry Barrens of Maine, USA
Source: MDPI journal article supplement (doi:10.3390/atmos13050690), 2022-04-26
Supplement: s1 [file s1]

## Supporting Figures and Tables

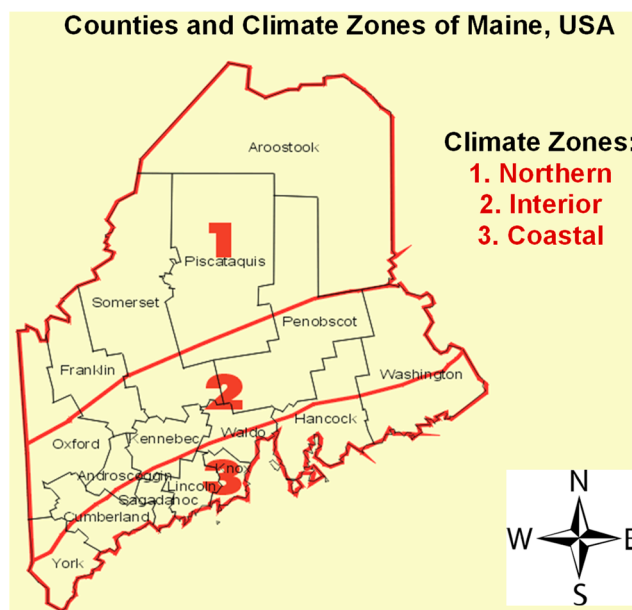

**Figure S1.** A map showing different counties and climate regions of Maine. (The map was acquired from NOAA National Weather Service, NOAA Center for Weather and Climate Prediction (website: [https://www.cpc.ncep.noaa.gov/products/analysis\\_monitoring/regional\\_monitoring/CLIM\\_DIVS/maine.gif](https://www.cpc.ncep.noaa.gov/products/analysis_monitoring/regional_monitoring/CLIM_DIVS/maine.gif); accessed on 22 March 2022).

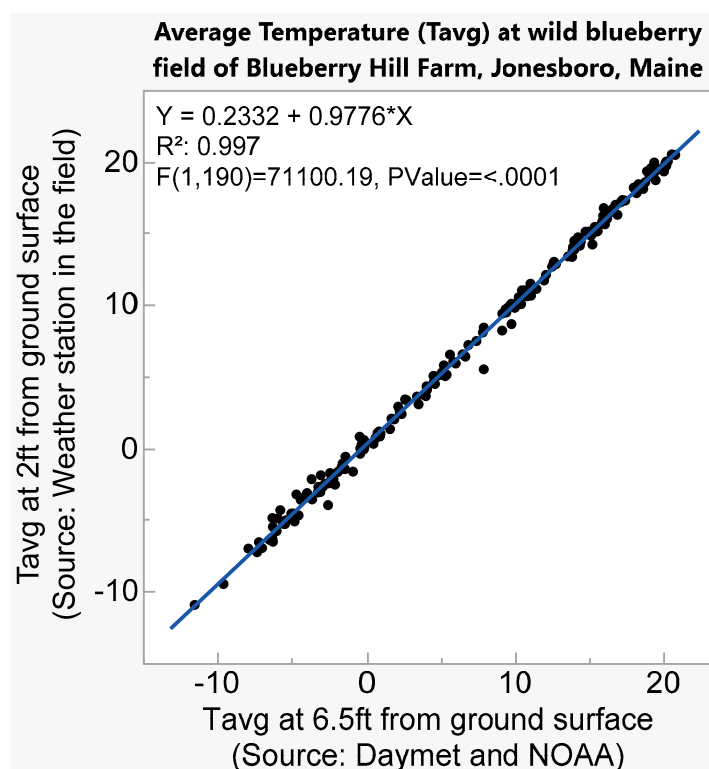

**Figure S2.** The relationship between average temperature recorded by different weather stations at 2 ft and 6.5 ft from the ground surface in a wild blueberry field at the Blueberry Hill Farm, Jonesboro, Maine. Here, each point represents monthly average temperature calculated from the recorded daily maximum and minimum temperature by the deployed weather stations. The solid line represents a linear relationship fitted to the data by linear regression analysis ( $p < 0.0001$ ) and the shaded region represents a 95% confidence interval.

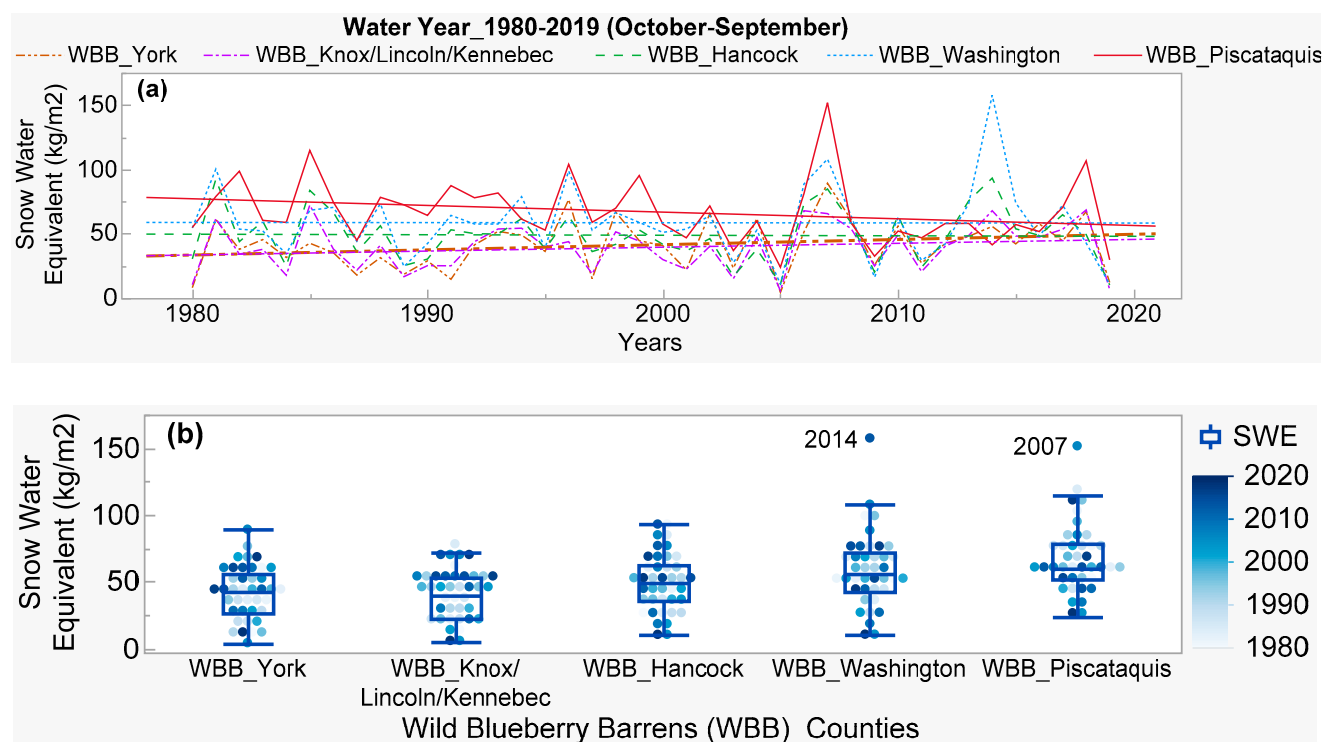

**Figure S3.** (a) Historical (water year: 1980 to 2019) changes with fitted linear regression trendlines for the snow water equivalent (SWE) throughout the studied wild blueberry barrens (WBB) and (b) Comparison of historical (water year: 1980 to 2019) snow water equivalent (SWE) among the studied wild blueberry barrens (WBB) at different counties from North-Central (Piscataquis) and North-East (Washington, Hancock) to South-West (Knox, Lincoln, Kennebec, York) of Maine as shown in Fig. 1 and S1. Here, 1980 water year indicates October 1980 to September 1981, and 2019 water year indicates October 2019 to September 2020.

**Table S1.** Historical trend analysis of Seasonal climate variables using Mann–Kendall test, and comparison of a linear regression fitted slopes using slope t-test among the studied wild blueberry barrens (WBB) at different counties from North-Central (Piscataquis) and North-East (Washington, Hancock) to South-West (Knox, Lincoln, Kennebec, York) of Maine (shown in Fig. 1) from 1980 to 2020. Bold parts indicate significant strength in historical climate trends. Different letters associated with the “Slope rate” and “°C/year” indicate significant differences among the counties at a significance level of  $p < 0.05$ .

| Season | Climate variables           | Mann-Kendall & Slope t-test | Wild Blueberry Barrens (WBB)_Counties |                   |                   |                           |                   |
|--------|-----------------------------|-----------------------------|---------------------------------------|-------------------|-------------------|---------------------------|-------------------|
|        |                             |                             | WBB_Piscataquis                       | WBB_Washington    | WBB_Hancock       | WBB_Knox/Lincoln/Kennebec | WBB_York          |
| Summer | T <sub>max</sub> in Fig. 5a | Kendall's tau               | <b>0.27</b>                           | <b>0.36</b>       | 0.14              | 0.12                      | 0.05              |
|        |                             | p-value                     | <b>0.01</b>                           | <b>0.0008</b>     | 0.21              | 0.24                      | 0.64              |
|        |                             | Trend                       | <b>Increasing</b>                     |                   |                   | Increasing                |                   |
|        |                             | Slope rate, °C              | 1a                                    | 1.5b              | 0.6c              | 0.6c                      | 0.2d              |
|        |                             | °C/year                     | 0.024a                                | 0.036b            | 0.015c            | 0.015c                    | 0.005d            |
|        |                             |                             |                                       |                   |                   |                           |                   |
|        | T <sub>min</sub> in Fig. 5b | Kendall's tau               | <b>0.4</b>                            | <b>0.47</b>       | <b>0.44</b>       | <b>0.38</b>               | <b>0.5</b>        |
|        |                             | p-value                     | <b>0.0002</b>                         | <b>&lt;0.0001</b> | <b>&lt;0.0001</b> | <b>0.0004</b>             | <b>&lt;0.0001</b> |
|        |                             | Trend                       | <b>Increasing</b>                     |                   |                   |                           |                   |

|                                                                   |                                  |                   |                                                                  |                   |               |              |              |
|-------------------------------------------------------------------|----------------------------------|-------------------|------------------------------------------------------------------|-------------------|---------------|--------------|--------------|
| Winter                                                            | T <sub>avg</sub> in<br>Fig. 5c   | Slope rate,<br>°C | 1.7ab                                                            | 1.8a              | 1.7ab         | 1.4b         | 1.9ac        |
|                                                                   |                                  | °C/year           | 0.04ab                                                           | 0.044a            | 0.04ab        | 0.034b       | 0.046ac      |
|                                                                   |                                  | Kendall's<br>tau  | <b>0.39</b>                                                      | <b>0.48</b>       | <b>0.35</b>   | <b>0.24</b>  | <b>0.31</b>  |
|                                                                   |                                  | <i>p</i> -value   | <b>0.0003</b>                                                    | <b>&lt;0.0001</b> | <b>0.0013</b> | <b>0.02</b>  | <b>0.004</b> |
|                                                                   |                                  | Trend             | <b>Increasing</b>                                                |                   |               |              |              |
|                                                                   |                                  | Slope rate,<br>°C | 1.3ab                                                            | 1.6b              | 1.1a          | 1a           | 1a           |
|                                                                   |                                  | °C/year           | 0.03ab                                                           | 0.04b             | 0.027a        | 0.024a       | 0.024a       |
|                                                                   | P <sub>total</sub> in<br>Fig. 5d | Kendall's<br>tau  | 0.02                                                             | 0.0073            | 0.0073        | 0.06         | 0.07         |
|                                                                   |                                  | <i>p</i> -value   | 0.8                                                              | 0.94              | 0.94          | 0.56         | 0.53         |
|                                                                   |                                  | Trend             | No change                                                        |                   |               |              |              |
|                                                                   | T <sub>max</sub> in<br>Fig. 7a   | Kendall's<br>tau  | 0.21                                                             | 0.21              | 0.16          | 0.15         | 0.04         |
|                                                                   |                                  | <i>p</i> -value   | 0.05                                                             | 0.05              | 0.12          | 0.17         | 0.67         |
|                                                                   |                                  | Trend             | Increasing                                                       |                   |               |              |              |
|                                                                   |                                  | Slope rate,<br>°C | 1.3a                                                             | 1ab               | 0.9b          | 0.8b         | 0.4c         |
|                                                                   |                                  | °C/year           | 0.03a                                                            | 0.024ab           | 0.022b        | 0.02b        | 0.009c       |
|                                                                   | T <sub>min</sub> in<br>Fig. 7b   | Kendall's<br>tau  | <b>0.26</b>                                                      | <b>0.24</b>       | <b>0.28</b>   | <b>0.23</b>  | <b>0.28</b>  |
|                                                                   |                                  | <i>p</i> -value   | <b>0.02</b>                                                      | <b>0.026</b>      | <b>0.009</b>  | <b>0.03</b>  | <b>0.008</b> |
|                                                                   |                                  | Trend             | <b>Increasing</b>                                                |                   |               |              |              |
|                                                                   |                                  | Slope rate,<br>°C | 2.1a                                                             | 2a                | 2a            | 1.9a         | 2a           |
|                                                                   |                                  | °C/year           | 0.051a                                                           | 0.049a            | 0.049a        | 0.046a       | 0.049a       |
|                                                                   | T <sub>avg</sub> in<br>Fig. 7c   | Kendall's<br>tau  | <b>0.25</b>                                                      | <b>0.23</b>       | <b>0.22</b>   | 0.19         | 0.18         |
|                                                                   |                                  | <i>p</i> -value   | <b>0.02</b>                                                      | <b>0.03</b>       | <b>0.04</b>   | 0.07         | 0.08         |
|                                                                   |                                  | Trend             | <b>Increasing</b>                                                |                   | Increasing    |              |              |
|                                                                   |                                  | Slope rate,<br>°C | 1.7a                                                             | 1.5ab             | 1.5ab         | 1.3b         | 1.3b         |
|                                                                   |                                  | °C/year           | 0.04a                                                            | 0.036ab           | 0.036ab       | 0.032b       | 0.032b       |
|                                                                   | P <sub>total</sub> in<br>Fig. 7d | Kendall's<br>tau  | 0.15                                                             | <b>0.22</b>       | 0.19          | 0.16         | 0.18         |
|                                                                   |                                  | <i>p</i> -value   | 0.15                                                             | <b>0.04</b>       | 0.08          | 0.14         | 0.09         |
|                                                                   |                                  | Trend             | Increasing                                                       | <b>Increasing</b> | Increasing    |              |              |
|                                                                   |                                  | Slope rate,<br>mm | 20-50 mm increasing rate (no significant changes among counties) |                   |               |              |              |
|                                                                   |                                  | mm/year           | 0.5-1.2 mm increasing rate per year                              |                   |               |              |              |
| Summer T <sub>max</sub> -<br>Winter T <sub>min</sub><br>in Fig. 8 | Kendall's<br>tau                 | -0.17             | -0.13                                                            | <b>-0.24</b>      | <b>-0.21</b>  | <b>-0.26</b> |              |
|                                                                   | <i>p</i> -value                  | 0.11              | 0.23                                                             | <b>0.02</b>       | <b>0.048</b>  | <b>0.02</b>  |              |
|                                                                   | Trend                            | Decreasing        |                                                                  | <b>Decreasing</b> |               |              |              |
|                                                                   | Slope rate,<br>°C                | 3a                | 1.5b                                                             | 3a                | 2.9a          | 3.6c         |              |
|                                                                   | °C/year                          | 0.073a            | 0.036b                                                           | 0.073a            | 0.07a         | 0.088c       |              |

|        |                                   |                 |                                                               |               |                   |                   |                   |
|--------|-----------------------------------|-----------------|---------------------------------------------------------------|---------------|-------------------|-------------------|-------------------|
| Fall   | T <sub>max</sub> in<br>Fig. 10a   | Kendall's tau   | <b>0.31</b>                                                   | <b>0.35</b>   | <b>0.28</b>       | <b>0.26</b>       | 0.13              |
|        |                                   | <i>p</i> -value | <b>0.004</b>                                                  | <b>0.0014</b> | <b>0.01</b>       | <b>0.01</b>       | 0.21              |
|        |                                   | Trend           | <b>Increasing</b>                                             |               |                   |                   | Increasing        |
|        |                                   | Slope rate, °C  | 2.2a                                                          | 2.1a          | 1.5b              | 1.5b              | 0.9c              |
|        |                                   | °C/year         | 0.053a                                                        | 0.051a        | 0.036b            | 0.036b            | 0.022c            |
|        | T <sub>min</sub> in<br>Fig. 10b   | Kendall's tau   | <b>0.42</b>                                                   | <b>0.41</b>   | <b>0.44</b>       | <b>0.48</b>       | <b>0.56</b>       |
|        |                                   | <i>p</i> -value | <b>&lt;0.0001</b>                                             | <b>0.0001</b> | <b>&lt;0.0001</b> | <b>&lt;0.0001</b> | <b>&lt;0.0001</b> |
|        |                                   | Trend           | <b>Increasing</b>                                             |               |                   |                   |                   |
|        |                                   | Slope rate, °C  | 2.5a                                                          | 2b            | 2.5a              | 2.4a              | 2.9c              |
|        |                                   | °C/year         | 0.06a                                                         | 0.049b        | 0.06a             | 0.058a            | 0.07c             |
|        | T <sub>avg</sub> in<br>Fig. 10c   | Kendall's tau   | <b>0.41</b>                                                   | <b>0.39</b>   | <b>0.37</b>       | <b>0.38</b>       | <b>0.38</b>       |
|        |                                   | <i>p</i> -value | <b>0.0002</b>                                                 | <b>0.0003</b> | <b>0.0007</b>     | <b>0.0004</b>     | <b>0.0005</b>     |
|        |                                   | Trend           | <b>Increasing</b>                                             |               |                   |                   |                   |
|        |                                   | Slope rate, °C  | 2.35a                                                         | 2a            | 2a                | 2a                | 1.9a              |
|        |                                   | °C/year         | 0.057a                                                        | 0.049a        | 0.049a            | 0.049a            | 0.046a            |
|        | P <sub>total</sub> in<br>Fig. 10d | Kendall's tau   | 0.14                                                          | 0.13          | 0.11              | 0.18              | 0.19              |
|        |                                   | <i>p</i> -value | 0.18                                                          | 0.21          | 0.3               | 0.09              | 0.07              |
|        |                                   | Trend & Rate    | Increasing 20-50 mm over 1980-2020                            |               |                   |                   |                   |
|        |                                   | mm/year         | 0.5-1.2 mm increasing (no significant changes among counties) |               |                   |                   |                   |
| Spring | T <sub>max</sub> in<br>Fig. 12a   | Kendall's tau   | 0.03                                                          | 0.08          | −0.04             | −0.03             | −0.11             |
|        |                                   | <i>p</i> -value | 0.77                                                          | 0.46          | 0.68              | 0.77              | 0.3               |
|        |                                   | Trend           | No significant changes                                        |               |                   |                   |                   |
|        | T <sub>min</sub> in<br>Fig. 12b   | Kendall's tau   | 0.05                                                          | 0.07          | 0.06              | 0.002             | 0.05              |
|        |                                   | <i>p</i> -value | 0.64                                                          | 0.5           | 0.56              | 0.98              | 0.6               |
|        |                                   | Trend           | No significant changes                                        |               |                   |                   |                   |
|        | T <sub>avg</sub> in<br>Fig. 12c   | Kendall's tau   | 0.03                                                          | 0.06          | −0.02             | −0.05             | −0.05             |
|        |                                   | <i>p</i> -value | 0.78                                                          | 0.57          | 0.87              | 0.65              | 0.65              |
|        |                                   | Trend           | No significant changes                                        |               |                   |                   |                   |
|        | P <sub>total</sub> in<br>Fig. 12d | Kendall's tau   | −0.002                                                        | −0.024        | −0.012            | −0.12             | 0.02              |
|        |                                   | <i>p</i> -value | 0.98                                                          | 0.82          | 0.91              | 0.26              | 0.84              |
|        |                                   | Trend           | No significant changes                                        |               |                   |                   |                   |
